# Supplementary material for: SARS-CoV-2 infections in people with primary ciliary dyskinesia: neither frequent, nor particularly severe
Source: PubMed Central journal article supplement — Eur Respir J. 2021 Aug 5;58(2):2004548. doi: 10.1183/13993003.04548-2020 (PMC8034057; doi:10.1183/13993003.04548-2020), 2021-08-05

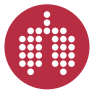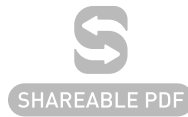

# SARS-CoV-2 infections in people with primary ciliary dyskinesia: neither frequent, nor particularly severe

Eva S.L. Pedersen <sup>1</sup>, Myrofora Goutaki <sup>1,2</sup>, Amanda L. Harris <sup>3</sup>, Lucy Dixon<sup>4</sup>, Michele Manion<sup>5</sup>, Bernhard Rindlisbacher<sup>6</sup>, COVID-PCD patient advisory group<sup>8</sup>, Jane S. Lucas <sup>3,7</sup> and Claudia E. Kuehni <sup>1,2</sup>

<sup>1</sup>Institute of Social and Preventive Medicine, University of Bern, Bern, Switzerland. <sup>2</sup>Paediatric Respiratory Medicine, Children's University Hospital of Bern, University of Bern, Bern, Switzerland. <sup>3</sup>Primary Ciliary Dyskinesia Centre, NIHR Biomedical Research Centre, University Hospital Southampton NHS Foundation Trust, Southampton, UK. <sup>4</sup>PCD Family Support Group, London, UK. <sup>5</sup>PCD Foundation, Minneapolis, MN, USA. <sup>6</sup>Selbsthilfegruppe Primäre Ciliäre Dyskinesie, Steffisburg, Switzerland. <sup>7</sup>University of Southampton Faculty of Medicine, School of Clinical and Experimental Medicine, Southampton, UK. <sup>8</sup>The members of the COVID-PCD patient advisory group are listed in the acknowledgements section.

Claudia E. Kuehni ([claudia.kuehni@ispm.unibe.ch](mailto:claudia.kuehni@ispm.unibe.ch))

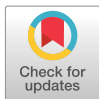

Shareable abstract (@ERSpublications)

In this longitudinal study of people with PCD followed weekly *via* online questionnaires, the incidence rate of COVID-19 and the proportion of participants infected were low, and the observed severity mostly mild <https://bit.ly/3frKICr>

**Cite this article as:** Pedersen ESL, Goutaki M, Harris AL, *et al.* SARS-CoV-2 infections in people with primary ciliary dyskinesia: neither frequent, nor particularly severe. *Eur Respir J* 2021; 58: 2004548 [DOI: 10.1183/13993003.04548-2020].

This single-page version can be shared freely online.

Copyright ©The authors 2021.

This version is distributed under the terms of the Creative Commons Attribution Non-Commercial Licence 4.0. For commercial reproduction rights and permissions contact [permissions@ersnet.org](mailto:permissions@ersnet.org)

Received: 17 Dec 2020  
Accepted: 24 March 2021

*To the Editor:*

The coronavirus disease 2019 (COVID-19) pandemic caused by severe acute respiratory syndrome coronavirus 2 (SARS-CoV-2) had by March 2021 infected  $\geq 115$  million people worldwide and caused  $>2.5$  million deaths. People with pre-existing chronic health conditions are reportedly at high risk of catching the disease and of having a severe disease course [1–4]. Primary ciliary dyskinesia (PCD) is a multisystem, genetic disease which affects approximately 1 in 10 000 people and leads to chronic upper and lower airway disease, laterality defects, including congenital heart disease, and other health problems [5–8]. In March 2020, PCD patient support groups contacted the paediatric respiratory research group at the University of Bern (Bern, Switzerland) with the wish to set up a study that generates evidence on the risk and evolution of COVID-19 in people with PCD. This led to the launch of COVID-PCD, a longitudinal online survey of health, shielding behaviours and quality of life of people with PCD during the pandemic. COVID-PCD is a participatory study that collects data in real-time directly from people with PCD using online questionnaires. This article provides the first data on risk and severity of SARS-CoV-2 infections among study participants for the time period between 30 May 2020 and 5 March 2021.

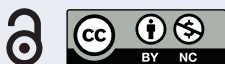

Supplement: ERJ-04548-2020.Shareable.pdf [file ERJ-04548-2020.Shareable.pdf]
